# Supplementary material
Source: PubMed Central journal article supplement (PMC4402496)

## Supplementary Material

**Figure S1. Longitudinal visualization of vascular density around tumor during tumor growth and regression in *Apc/Kras* mice.** **A**, The images were obtained from a control animal. **B**, An animal treated with 10 mg/kg DC101. **C**, An animal treated with 40 mg/kg DC101. DC101 was intraperitoneally injected once every 3 days for 12 weeks. **D**, A mouse treated with 40 mg/kg of sunitinib orally administered once a day for 12 weeks. Scale bar, 250  $\mu\text{m}$ .

**Figure S2. Monitoring the change of vascular density around tumors during early colorectal tumorigenesis.** To observe changes in the vasculature, rhodamine dextran conjugates (500  $\mu\text{g}/100 \mu\text{l}$ , 2,000,000 MW, Invitrogen) were intravenously injected to *Apc* (n=2) and *Apc/Kras* mice (n=2), and the vascular images were taken from week 2 to week 14 by confocal microscope. Vascular (rhodamine-positive) area was analyzed with Image J 2.0. Data are normalized to corresponding Week 2 value.

**Figure S3. Change of tumor duration after treatment of VEGF antagonists.** The lifetimes of tumor were measured from the longitudinal monitoring data in Fig. 3A-D. The differences between animal groups were statistically analyzed using Wilcoxon rank sum test. ns, not significant; \*,  $P < 0.05$ ; \*\*,  $P < 0.01$ .

Fig.S1

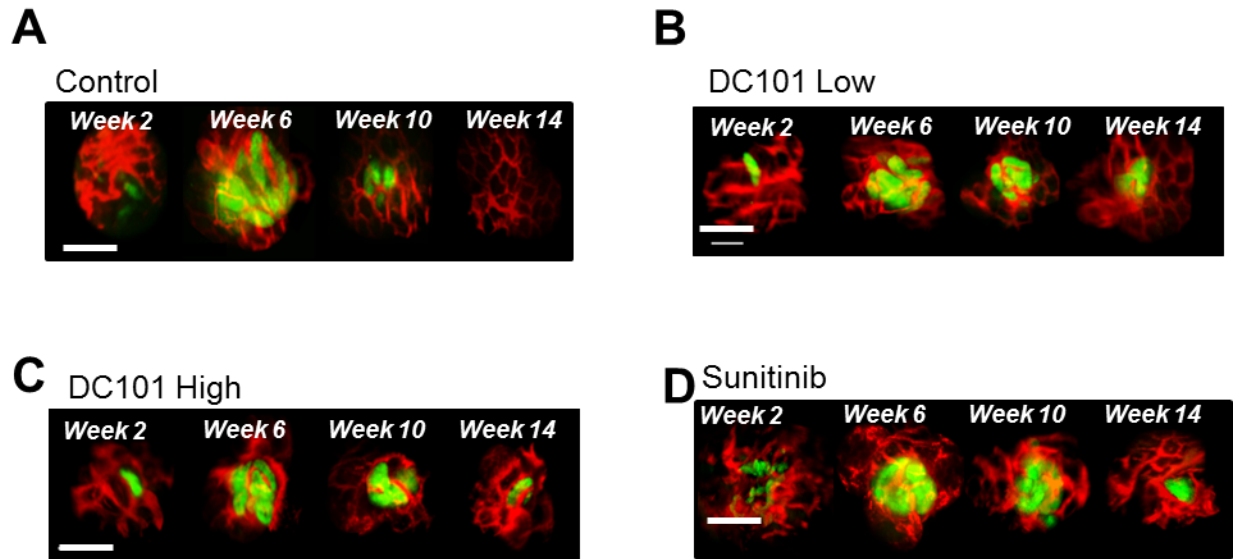

Fig.S2

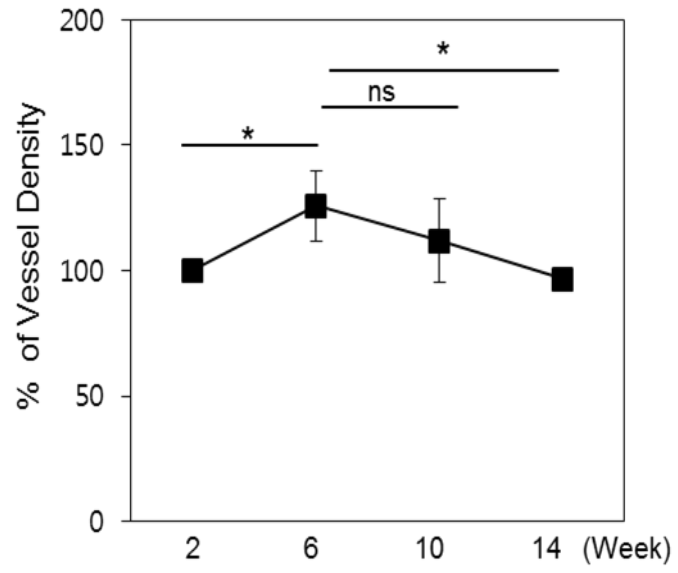

Fig.S3

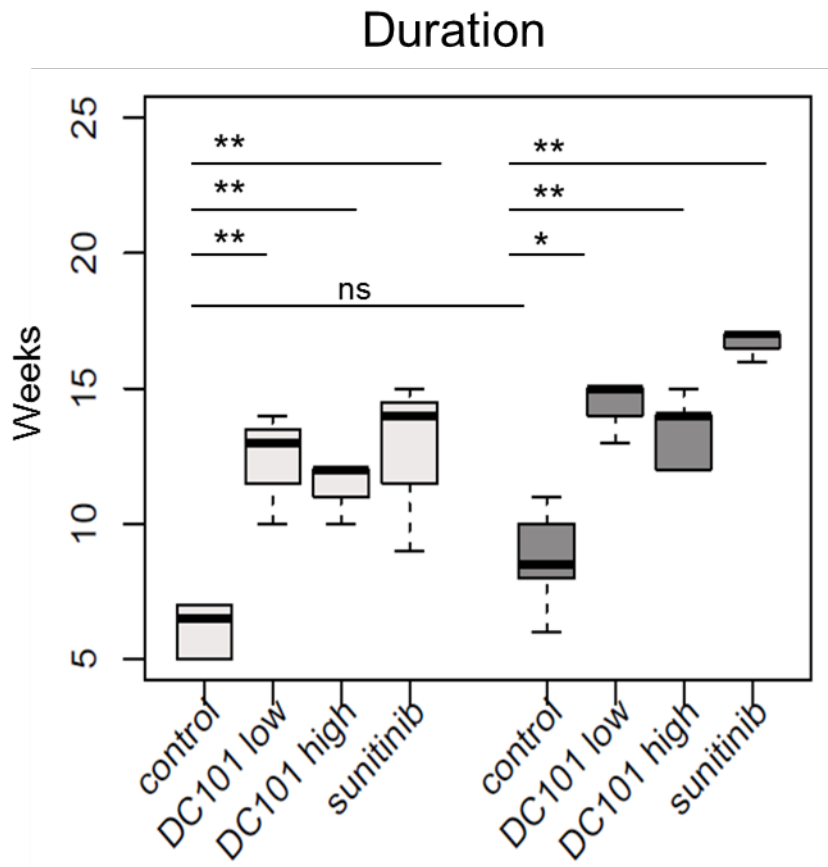

Supplement: thnov05p0724s1.pdf [file thnov05p0724s1.pdf]
